# Supplementary material for: The solution and solid state structure of {[1-(dimethylamino)-8-naphthyl]lithium·THF }2†
Source: Royal Society of Chemistry journal article supplement (doi:10.1039/b009077h), 2001-01-01
Supplement: b009077h.doc [file b009077h.doc]

# Supporting Information

**[1-(Dimethylamino)-8-naphthyl]lithium**

NMR investigations on the lithiation of DMNA with *tert*‑BuLi in benzene‑*d*6 and with *n*‑BuLi in THF‑*d*8 reveal comparable 1H spectra (differences in these spectra are due to different solvent properties). COSY spectra of both compounds clearly show that lithiation occurs preferred in the *peri* position.

Figure 1: 1H Spectrum of [1-(dimethylamino)-8-naphthyl]lithium in THF‑*d*8.

Figure 2: COSY spectrum of [1-(dimethylamino)-8-naphthyl]lithium in THF‑*d*8 (7.0 – 8.5 ppm).

Figure 3: PM3 calculations on a) (**3**·THF)2, b) (**3**·Et2O)2 and c) unsolvated dimeric [1- (dimethylamino)-8-naphthyl]lithium (**3**). One naphthyl plane and the lithium atoms with their coordinated solvent (if present) are shown. Hydrogen atoms are omitted.

Figure 4: PM3 calculations on a) (**4**·THF)2 and b) unsolvated dimeric 1-methoxy-8-naphthyllithium (**3**). One naphthyl plane and the lithium atoms with their coordinated solvent (if present) are shown. Hydrogen atoms are omitted.
